# Supplementary material for: Dual separable feedback systems govern firing rate homeostasis
Source: eLife journal article supplement (doi:10.7554/elife.45717), 2019-04-11
Supplement: supp [file elife-45717-supp-v1.zip]

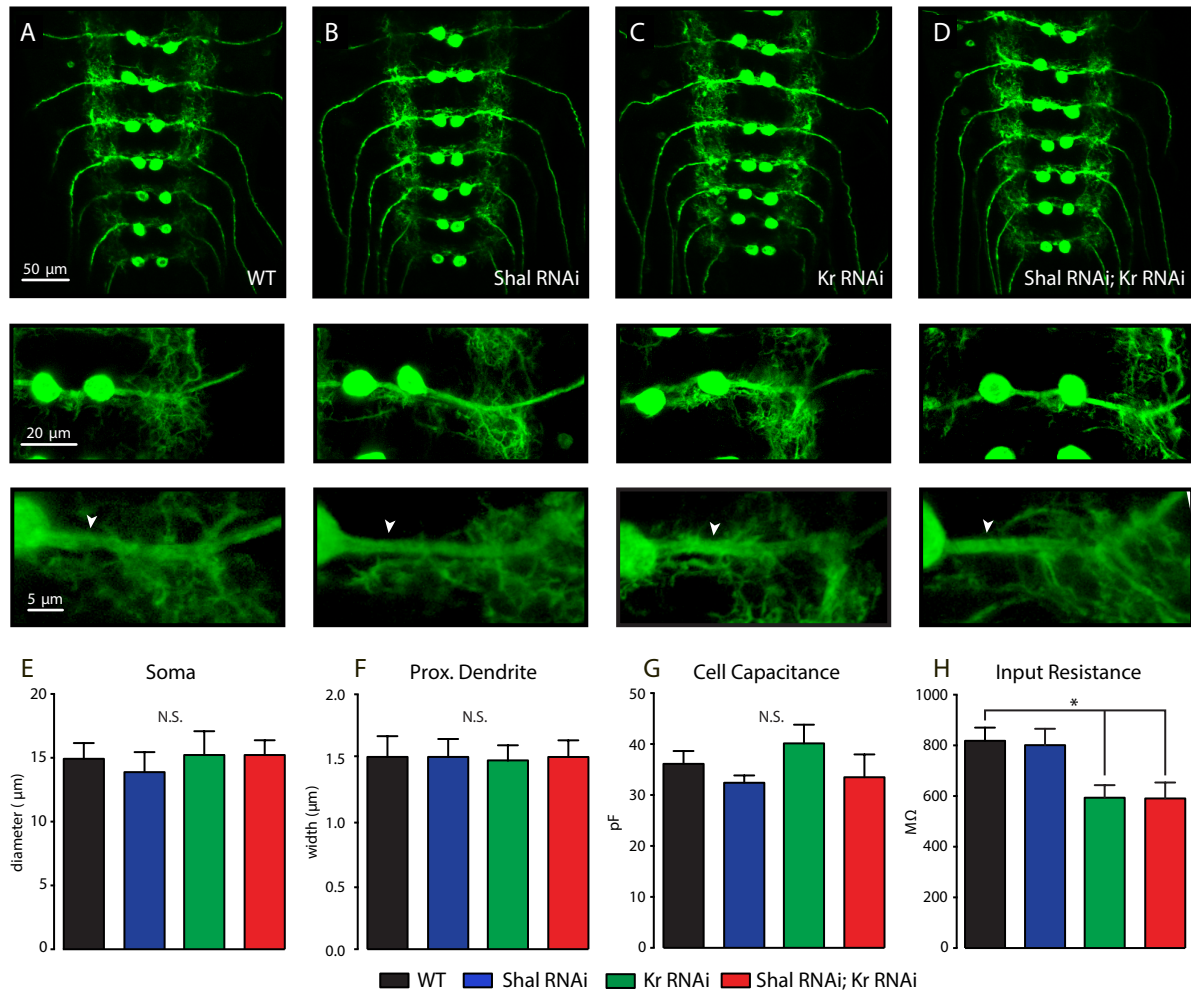

Figure 3 - Figure Supplement 2

Figure 3 - Figure Supplement 2: Normal Motoneuron Morphology. (A-D) Confocal max projections of MN1-Ib motoneurons (MN1-GAL4 > UAS-CD8:GFP) in WT (A), Shal-RNAi (B), Krüppel (Kr)-RNAi, C) and combined Shal and Krüppel-RNAi (Shal-RNAi; Kr-RNAi, D). Representative MN1-Ibs shown at higher magnification in inserts to reveal single neuron morphology. Arrows indicate MN1-Ib primary dendrite. (E, F) Quantification of somatic diameter (E) and proximal dendrite width (F) in WT (back), Shal-RNAi (blue), Krüppel-RNAi (Kr, green) and combined Shal and Krüppel-RNAi (Shal-RNAi; Kr-RNAi, red). (G, H) Whole-cell capacitance (G) and input resistance (H) in WT (back), Shal-RNAi (blue), Krüppel-RNAi (Kr, green) and combined Shal-RNAi and Krüppel-RNAi (Shal-RNAi; Kr-RNAi, red). Mean  $\pm$  S.E.M.; \*p < 0.05; \*\*p < 0.005; \*\*\*p < 0.0005. N.S., not significant; one-way ANOVA with Bonferoni post-hoc tests.
