# Supplementary material for: Dual separable feedback systems govern firing rate homeostasis
Source: eLife journal article supplement (doi:10.7554/elife.45717), 2019-04-11
Supplement: supp [file elife-45717-supp-v1.zip]

Archive with 5 entries (5 files):
- elife_poa_e45717_Figure_1_figure_supplement_1.pdf
- elife_poa_e45717_Figure_1_figure_supplement_2.pdf
- elife_poa_e45717_Transparent_Reporting_File.docx
- elife_poa_e45717_Figure_3_figure_supplement_1.pdf
- elife_poa_e45717_Figure_3_figure_supplement_2.pdf
