# Supplementary material for: Dual separable feedback systems govern firing rate homeostasis
Source: eLife journal article supplement (doi:10.7554/elife.45717), 2019-04-11
Supplement: supp [file elife-45717-supp-v1.zip › elife_poa_e45717_Figure_1_figure_supplement_1.pdf]

#### Action Potential Quantification

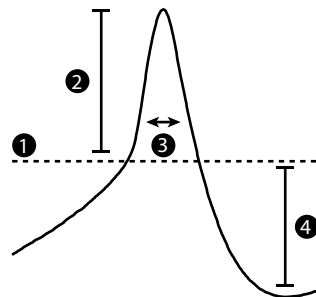

1. Threshold
2. Action potential amplitude
3. Action potential half-width
4. Afterhyperpolarization amplitude

Figure 1 - Figure Supplement 1

Figure 1 - Figure Supplement 1: Action Potential Waveform Measurements. Action potential threshold was the membrane potential at the first inflection point, calculated as 1.5 standard deviations away from the mean second derivative of the AP wave at baseline. Action potential amplitude (AP amp) was the difference in voltage between the threshold and the maximum potential. Action potential half-width (AP HW) was the AP width at half-max amplitude. Afterhyperpolarization amplitude (AHP) was the difference in voltage between threshold and the minimum potential after the peak. AP amp, AP HW, and AHP measurements were averaged from all action potentials elicited from a standard current step protocol for each cell.
