# Supplementary material for: Dual separable feedback systems govern firing rate homeostasis
Source: eLife journal article supplement (doi:10.7554/elife.45717), 2019-04-11
Supplement: supp [file elife-45717-supp-v1.zip › elife_poa_e45717_Figure_1_figure_supplement_2.pdf]

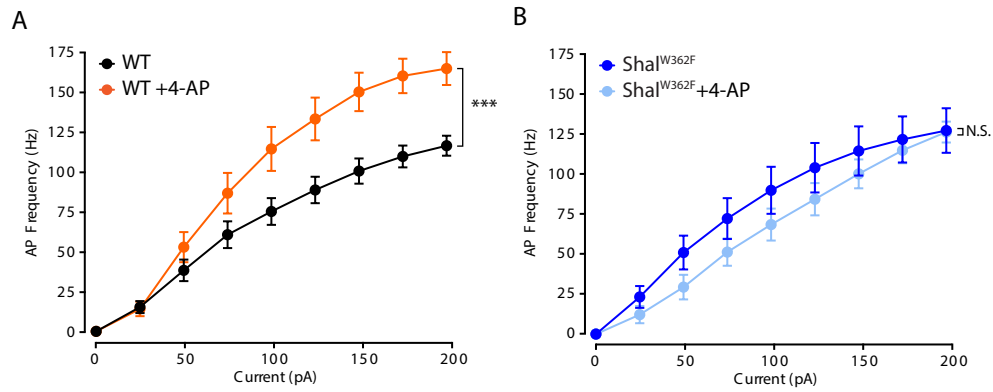

Figure 1 - Figure Supplement 2

Figure 1 - Figure Supplement 2: 4-AP Does Not Increase Firing Rates in ShalW362F Motoneurons. (A) F-I curves of WT (black, n=9) and WT+4-AP (orange, n=9). (B) F-I curves of ShalW362F (dark blue, n=5) and ShalW362F +4-AP (light blue, n=9). Mean  $\pm$  S.E.M.; two-way RM-ANOVA and Bonferroni's multiple comparisons test.
