# Supplementary material for: Dual separable feedback systems govern firing rate homeostasis
Source: eLife journal article supplement (doi:10.7554/elife.45717), 2019-04-11
Supplement: supp [file elife-45717-supp-v1.zip › elife_poa_e45717_Figure_3_figure_supplement_1.pdf]

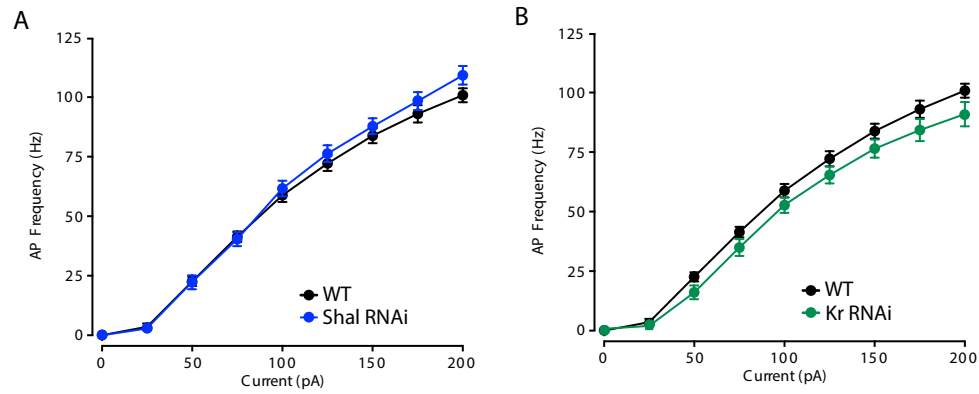

Figure 3 - Figure Supplement 1

Figure 3 - Figure Supplement 1: Kr Does Not Contribute to Setting MN1 Baseline Firing Rate. (A) F-I curves of WT (black, n=10) and Shal-RNAi (blue, n=15). (B) F-I curves of WT (black, n=10) and Kr-RNAi (green, n=8). Mean  $\pm$  S.E.M.; two-way RM-ANOVA and Bonferroni's multiple comparisons test.
